# Supplementary material for: Cisplatin nephrotoxicity in male beagle dogs: next-generation protein kidney safety biomarker tissue expression and related changes in urine
Source: Royal Society of Chemistry journal article supplement (doi:10.1039/c5tx00497g), 2016-01-01
Supplement: c5tx00497g1.pdf [file c5tx00497g1.pdf]

**Supplementary Figure 1.**

**A.**

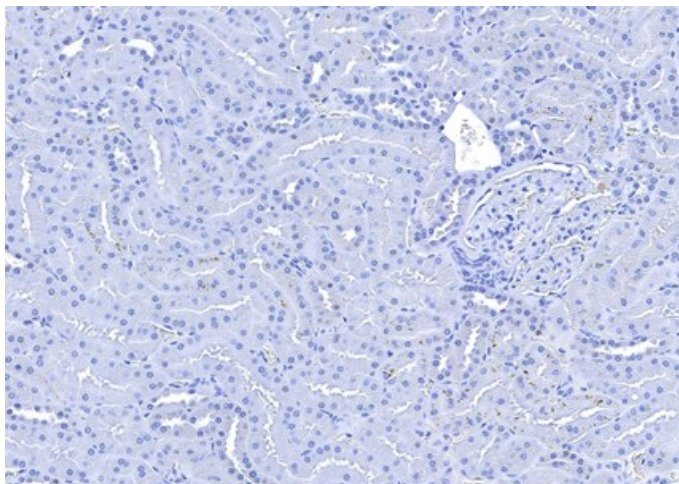

**B.**

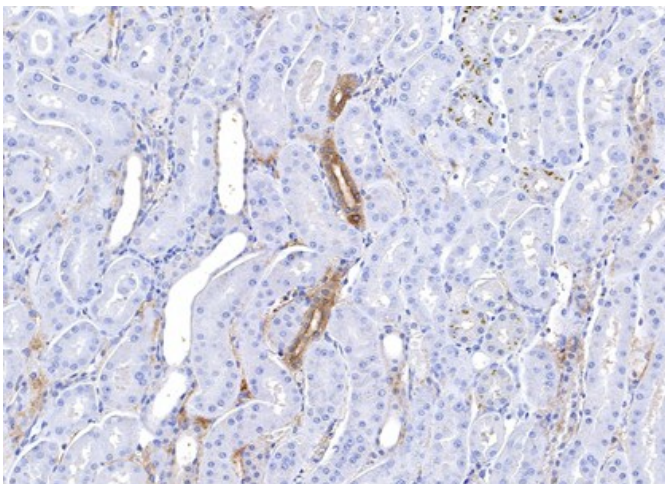

C.

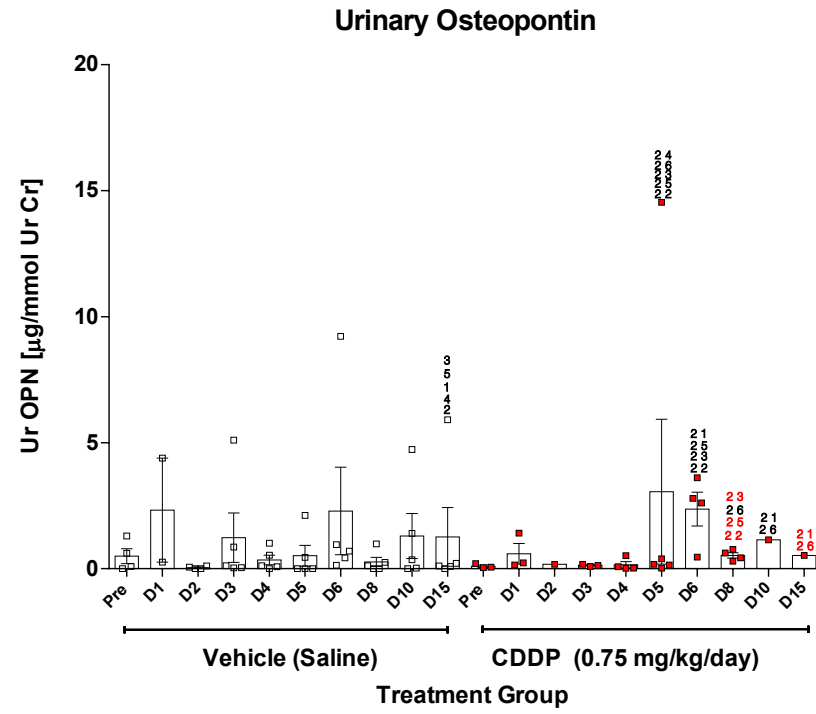

Supplementary Figure 2.

A.

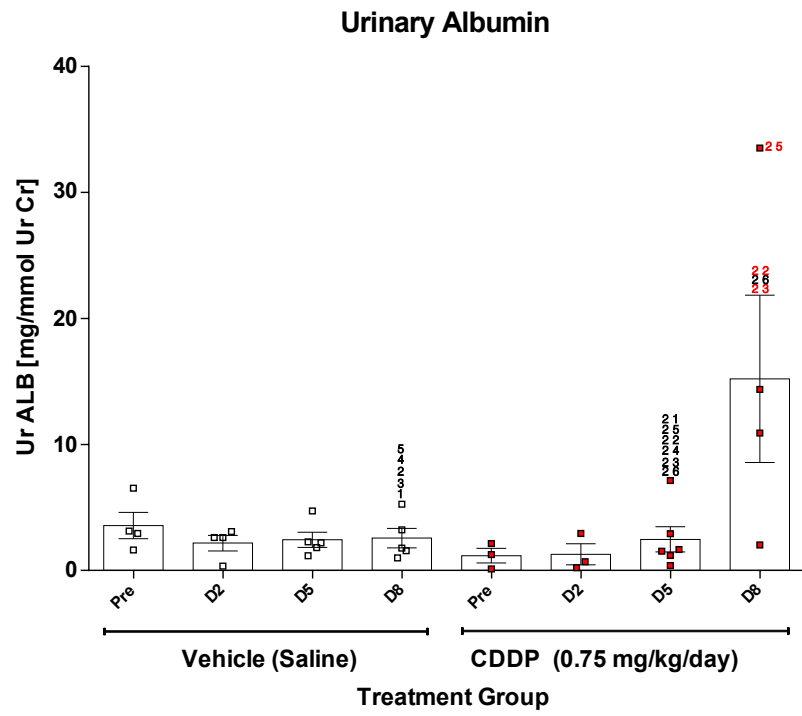

B.

### Urinary Neutrophil Gelatinase-Associated Lipocalin

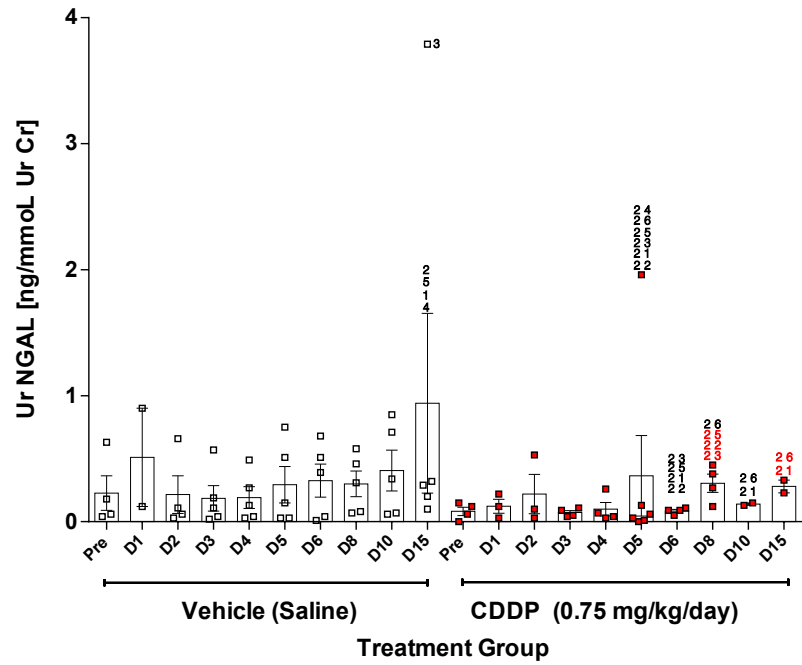

C.

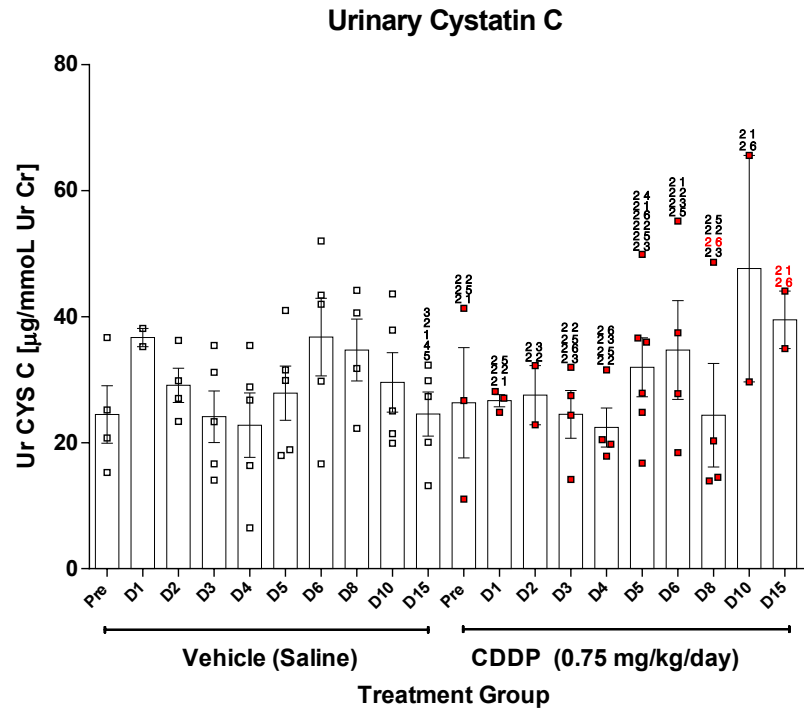

D.

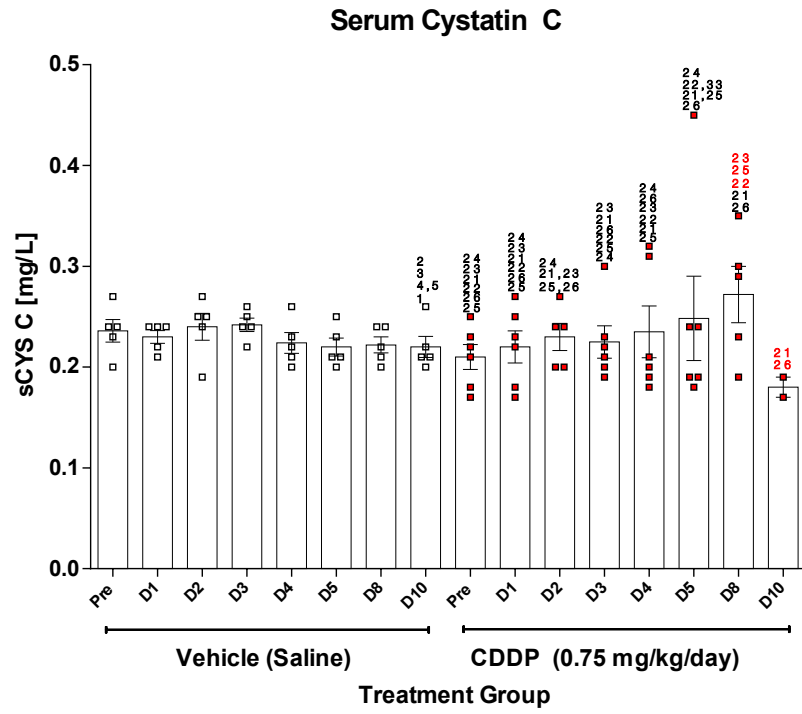

Supplementary Figure 3.

A.

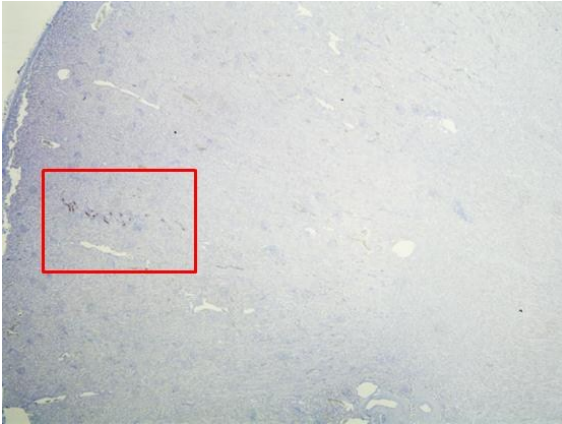

B.

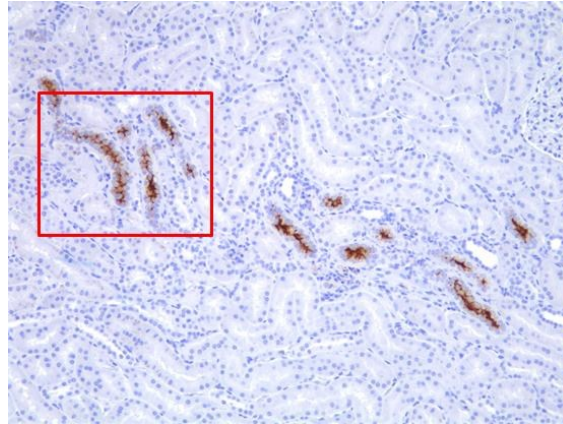

C.

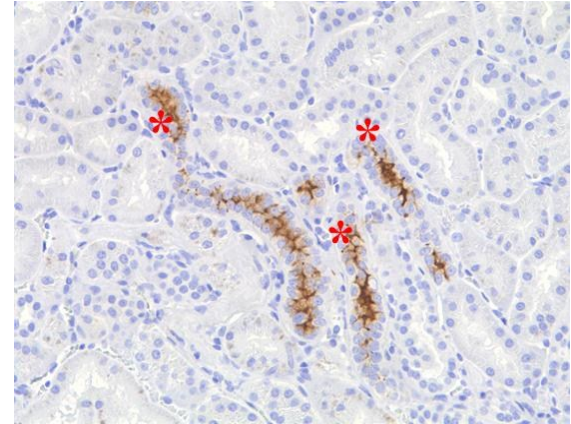

D.

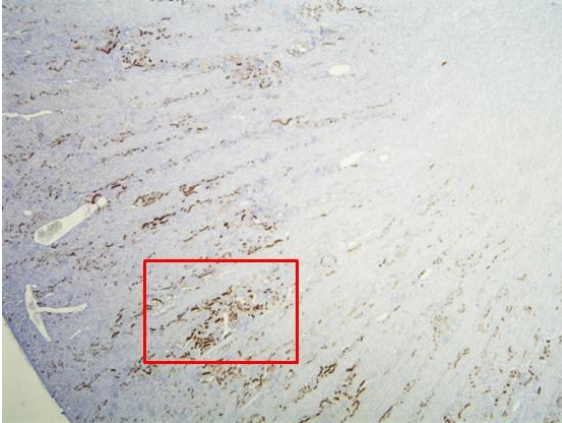

E.

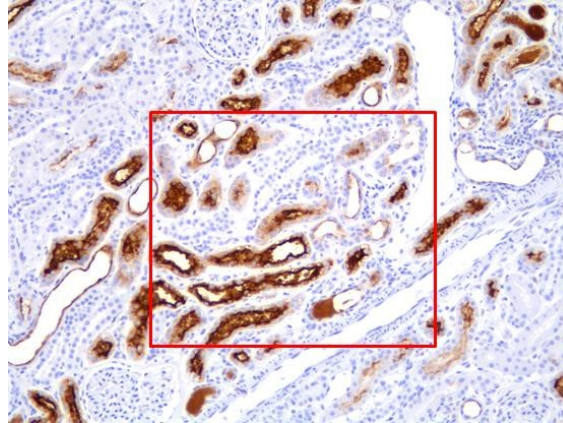

F.

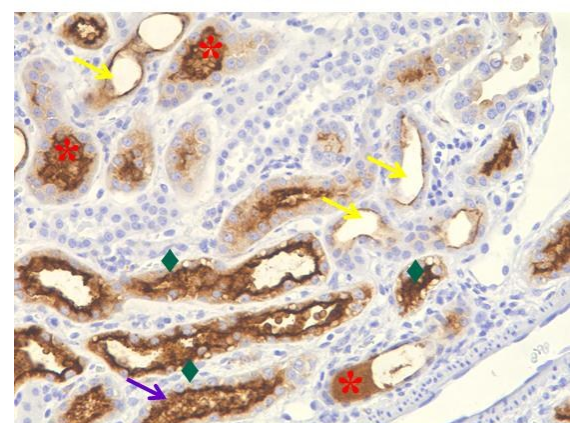

Supplementary Figure 3. (continued)

G.

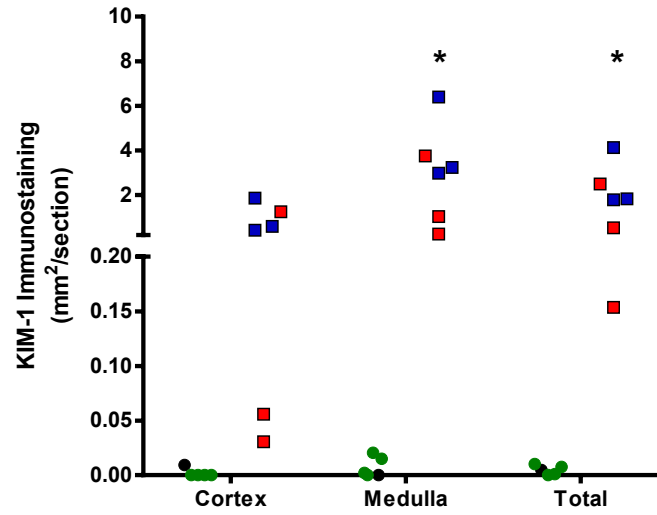



H.

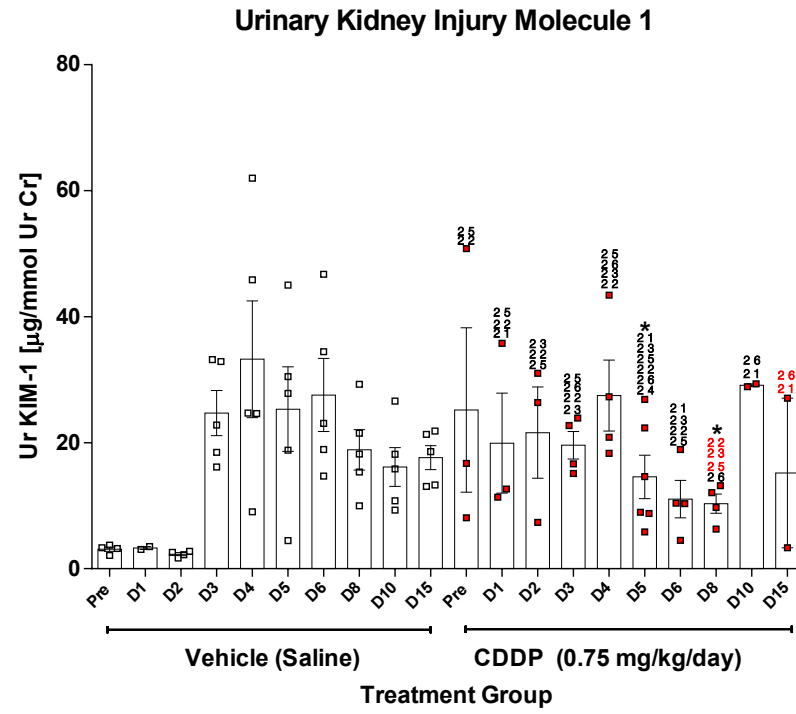



Supplementary Figure 5.

**Cisplatin Beagle Dogs Feasibility Study Design**

|                                 |                                                                                                   |
|---------------------------------|---------------------------------------------------------------------------------------------------|
| Group 1: Vehicle                | 0.9% Saline for Injection (USP)                                                                   |
| Group 2: Cisplatin (CDDP)       | 0.75 mg/kg/dose                                                                                   |
| Route of administration         | IV slow infusion (~20 minutes)                                                                    |
| Dosing regimen                  | Once daily/ 5 consecutive days                                                                    |
| Non-naïve animals (fasted)      | Male Beagle dogs (5-6/group)                                                                      |
| Blood/urine collection(s)       | Predose, D1-D6, D8, D10 and 15                                                                    |
| Toxicologic pathology endpoints | Serum CDDP, blood/urine biomarkers, kidney histopathology and kidney immunohistochemical staining |
